# Supplementary material for: Development of the oncolytic virus, CF33, and its derivatives for peritoneal-directed treatment of gastric cancer peritoneal metastases
Source: HighWire-hosted journal article supplement (doi:10.1136/jitc-2022-006280), 2023-04-01
Supplement: jitc-2022-006280supp001_data_supplement.pdf [file jitc-2022-006280supp001_data_supplement.pdf]

## Development of the Oncolytic Virus, CF33 and its Derivatives for Peritoneal-Directed Treatment of Gastric Cancer Peritoneal Metastases

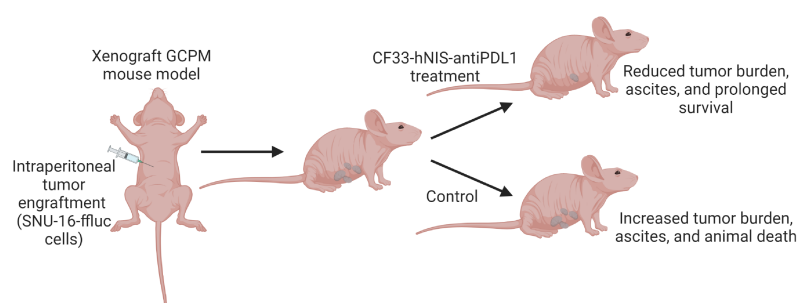

### Authors

Annie Yang, Zhifang Zhang, Shyambabu Chaurasiya, Anthony K. Park, Audrey Jung, Jianming Lu, Sang-In Kim, Saul Priceman, Yuman Fong, Yanghee Woo

### Correspondence

yhwwoo@coh.org, zhzhzhang@coh.org

### In Brief

CF33-OVs demonstrate robust in vitro and in vivo antitumor effects in GCPM models. Intraperitoneal delivery of CF33-hNIS-antiPDL1 leads to tumor regression and prolonged animal survival in a xenograft GCPM mouse model.
